1 **Association between Fine Particulate Matter Exposure and Cerebrospinal Fluid**  
2 **Biomarkers of Alzheimer's Disease among a Cognitively Healthy Population-based**  
3 **Cohort**

4 Emma Casey<sup>1</sup>, Zhenjiang Li<sup>2</sup>, Donghai Liang<sup>1,2</sup>, Stefanie Ebel<sup>1,2</sup>, Allan I. Levey<sup>3</sup>, James J. Lah<sup>3</sup>,  
5 Thomas S. Wingo<sup>3,4</sup>, Anke Hüls<sup>1,2</sup>

6  
7 <sup>1</sup> Department of Epidemiology, Rollins School of Public Health, Emory University, Atlanta, GA, USA

8 <sup>2</sup> Gangarosa Department of Environmental Health, Rollins School of Public Health, Emory  
9 University, Atlanta, GA, USA

10 <sup>3</sup> Department of Neurology, School of Medicine, Emory University, Atlanta, GA, USA

11 <sup>4</sup> Department of Human Genetics, School of Medicine, Emory University, Atlanta, GA, USA

12

13 **Corresponding author:**

14 Anke Hüls, PhD

15 Rollins School of Public Health, Emory University

16 1518 Clifton Road, Atlanta, GA, 30322

17 E-mail: [anke.huels@emory.edu](mailto:anke.huels@emory.edu)

18

19 **Funding and Sources of support:** This work used data collected by the Emory Healthy Brain Study  
20 and was supported by the National Institute on Aging (NIA) [R01AG070937 (Lah) and  
21 R01AG079170 (Hüls/Wingo)] and a HERCULES Pilot Project via National Institute of Environmental  
22 Health Sciences (NIEHS) P30ES019776 (Hüls). The traffic-related air pollution exposure  
23 assessment was supported by Pilot Grant via NIA P50AG025688 (Hüls/Liang) and the NIH grant  
24 R21ES032117 (Liang).

25

26 **Acknowledgments:** We would like to thank Lihua Shi and her team who provided us with  
27 guidance for the air pollution assignments of ambient PM<sub>2.5</sub>. We also want to thank Dr. Jeremy A.  
28 Sarnat (Emory), Dr. Armistead Russell (Georgia Tech), Ms. Kyung-Hwa Kim, and Ms. Abby Marinelli  
29 from the Atlanta Regional Commission for providing data and guidance towards the traffic-related air  
30 pollution exposure assessment.

31

32 **Conflicts of interest:** The authors declare they have nothing to disclose.

33 **Abstract**

34

35 **Background:** Epidemiological evidence suggests air pollution adversely affects cognition and  
36 increases the risk of Alzheimer's disease (AD), but little is known about the biological effects of fine  
37 particulate matter (PM<sub>2.5</sub>) on early predictors of future disease risk.

38

39 **Objectives:** We investigated the association between 1, 3, and 5-year exposure to ambient and  
40 traffic-related PM<sub>2.5</sub> and cerebrospinal fluid (CSF) biomarkers of AD.

41

42 **Methods:** We conducted a cross-sectional analysis using data from 1,113 cognitively healthy adults  
43 (aged 45-75 years) from the Emory Healthy Brain Study in Georgia, USA. CSF biomarker  
44 concentrations of A $\beta$ <sub>42</sub>, tTau, and pTau, were collected at enrollment (between 2016-2020) and  
45 analyzed with the Roche Elecsys system. Annual ambient and traffic-related residential PM<sub>2.5</sub>  
46 concentrations were estimated at a 1km and 250m resolution, respectively, and 3- and 5-year  
47 average exposures were computed for each participant based on time of specimen collection.  
48 Associations between PM<sub>2.5</sub> and CSF biomarker concentrations, considering continuous and  
49 dichotomous (dichotomized at clinical cut-offs for AD-biomarker positivity) outcomes, were estimated  
50 with multiple linear/logistic regression, respectively, controlling for potential confounders (age,  
51 gender, race/ethnicity, body mass index, and neighborhood socioeconomic status).

52

53 **Results:** Interquartile range (IQR; IQR=0.845) increases in 1-year [ $\beta$ : -0.101; 95%-confidence  
54 interval (CI): -0.18, -0.02] and 3-year ( $\beta$ : -0.078; 95%-CI: -0.15, -0.00) ambient fine PM<sub>2.5</sub> exposures  
55 were negatively associated with A $\beta$ <sub>42</sub> CSF concentrations. Associations between ambient PM<sub>2.5</sub> and  
56 A $\beta$ <sub>42</sub> were similar for 5-year estimates, but not significant ( $\beta$ : -0.076; 95%-CI: -0.160, 0.005).  
57 Dichotomized CSF variables revealed similar and significant associations between ambient PM<sub>2.5</sub>  
58 and A $\beta$ <sub>42</sub>. Associations with traffic-related PM<sub>2.5</sub> were similar but not significant. PM<sub>2.5</sub> exposures  
59 were not associated with tTau, pTau, tTau/A $\beta$ <sub>42</sub>, or pTau/A $\beta$ <sub>42</sub> levels at enrollment.

60

61 **Conclusion:** In our cross-sectional study, PM<sub>2.5</sub> exposure was associated with a significant  
62 decrease in CSF A $\beta$ <sub>42</sub> which suggests an accumulation of amyloid plaques in the brain and an  
63 increased risk of developing AD.

64

65 300/300

## 66 Introduction

67  
68 As life expectancy rises and the U.S. population pyramid continues to age, we are seeing an  
69 increase in chronic non-communicable age-related conditions, including Alzheimer's disease and  
70 related dementias (AD/ADRD). With the multifactorial nature of AD pathogenesis, building evidence  
71 around preventable environmental exposures may ultimately reduce inequities and improve health  
72 outcomes. In this regard, accumulating epidemiological evidence demonstrates an association  
73 between exposure to air pollution and the prevalence of AD/ADRD. Most of the evidence to date has  
74 focused on links between fine particulate matter (PM<sub>2.5</sub>), a mixture of fine particles in the air, and  
75 cognitive function, incident cognitive impairment, or dementia.<sup>1-4</sup> Incident dementia is often studied  
76 using diagnostic codes on insurance billing claims and medical records, facilitating studies with large  
77 sample sizes; however, billing data are known to miss true dementia cases<sup>1,5</sup> and there are no  
78 diagnostic codes for the preclinical stages of dementia. In addition, PM<sub>2.5</sub> can pass through the lung-  
79 gas-blood barrier, the gut-brain axis or directly enter brain tissue via the olfactory nerve to promote  
80 oxidative stress and inflammation, processes directly related to the characteristic pathology of AD.<sup>6,7</sup>  
81 Since PM<sub>2.5</sub> is a heterogeneous mixture, different sources of exposure often have varying degrees of  
82 toxicity and most existing studies have focused on ambient exposure, rather than those merely from  
83 traffic-related emissions. Understanding the impact of PM<sub>2.5</sub>, from both ambient and traffic-related  
84 sources, on preclinical stages of dementia in older at-risk adults is crucial from a public health  
85 perspective, as it will improve the estimation of the burden of disease in association with air pollution  
86 by identifying more affected individuals.

87  
88 Recent systematic reviews highlight the need to expand the scope of current studies on air pollution  
89 and dementia risk to include neuropathologically relevant outcomes, such as early indicators of  
90 dementia, including AD cerebrospinal fluid (CSF) and plasma-based biomarkers, which can be  
91 assessed at the late stage of the preclinical phase.<sup>1,4,8</sup> A recent study found positive associations  
92 between PM<sub>2.5</sub> and amyloid  $\beta$ -protein (A $\beta$ )1-40 from plasma in longitudinal analyses, but no  
93 associations were detected between PM<sub>2.5</sub> and A $\beta$ 1-42 or the ratio of A $\beta$ 1-42/A $\beta$ 1-40.<sup>9</sup> Blood-based  
94 biomarkers of protein pathology are less predictive of brain pathology and have shown insignificant  
95 changes in A $\beta$  levels as compared to CSF A $\beta$  biomarkers in AD patients.<sup>10</sup> In this light, three  
96 clinically validated CSF biomarkers: A $\beta$ <sub>42</sub>, total tau (tTau), and phosphorylated tau (pTau) have been  
97 noted as valid proxies for neuropathological changes of AD,<sup>8,11</sup> and specifically, A $\beta$ <sub>42</sub> has been  
98 linked to the abnormal pathologic state of cerebral A $\beta$  in both animal and human models. Since  
99 pathological changes related to AD can begin decades before symptoms appear,<sup>12</sup> quantifying the  
100 relationship between both ambient and traffic-related PM<sub>2.5</sub> pollution and CSF biomarkers reflective  
101 of AD-positive changes will elucidate how exposure influences dementia risk.<sup>13</sup>

102  
103 So far, two epidemiological studies have reported associations between PM<sub>2.5</sub> and A $\beta$ <sub>42</sub> in cognitively  
104 healthy individuals whereas no relationships with tTau or pTau have been noted.<sup>14,15</sup> However, there  
105 are several limitations with these prior studies, including 1) the exposure assessments in Alemany *et*  
106 *al.* (2021) and Li *et al.* (2022) only focused on 1- or 2-year average PM<sub>2.5</sub> prior to the biomarker  
107 assessment; 2) the relatively small sample size (N=156) in Alemany *et al.* (2021),<sup>15</sup> and 3) the  
108 outcome assessment in Li *et al.* (2022)<sup>14</sup> which relied on the Innotech-AMYLOID(1-42) ELISA assay,  
109 an unstandardized manual method, showing a high correlation with the automated Elecsys® method  
110 but higher intra- and inter-laboratory variations.<sup>16,17</sup>

111

112 To address these limitations in prior studies and grow our understanding of the impact of air pollution  
113 on preclinical dementia risk, here, we characterized the cross-sectional association between long-  
114 term ambient and traffic-related PM<sub>2.5</sub> exposure (1, 3, and 5 years prior to biomarker assessment)  
115 and CSF biomarker composition (Aβ<sub>42</sub>, tTau, and pTau, assessed with Elecsys® AD CSF assays) in  
116 a dementia-free, aging population, as part of the Emory Healthy Brain Study (EHBS). We also tested  
117 for effect modification by several well-known risk factors for AD/ADRD-related outcomes, including  
118 *APOE-ε4* status, the strongest genetic risk factor for AD.

119

## 120 **Methods**

121

### 122 *Study Design and Population*

123

124 The EHBS is a gerontology-based prospective research study focusing on the cognitive health of  
125 older adults. The EHBS is nested within the Emory Healthy Aging Study (EHAS) and includes  
126 participants from the metro-Atlanta region in Georgia, USA. Our cross-sectional analysis includes  
127 data from the baseline visits, which were conducted between 2016 and 2020. The primary aim of the  
128 EHBS is to characterize psychological and psychosocial factors associated with normal and  
129 abnormal aging through assessment of the central nervous system among adults 45-75 years old  
130 who were free of cognitive impairment in addition to several other chronic conditions (e.g. congestive  
131 heart failure, multiple sclerosis, HIV) at enrollment; more details on recruitment and eligibility have  
132 been published elsewhere.<sup>18</sup>

133

134 Demographic characteristics were collected with the online Health History Questionnaire (HHQ).<sup>18</sup>  
135 Individual-level information was self-reported for gender, age, race/ethnicity, educational attainment,  
136 and residential address. Participants could choose one or more race(s) from a 5-item list  
137 (White/Caucasian, Black/African American, Asian, American Indian/Alaska Native, Hawaiian/Other  
138 Pacific Islander). Hispanic ethnicity (Yes/No) was addressed in a separate HHQ question. Data on  
139 educational attainment were also self-reported with 7 possible categories ranging from less than  
140 high school to professional or doctorate degree. EHBS biennial study visits include neuropsychology  
141 tests, biospecimen collection (blood, cerebrospinal fluid), cardiovascular measures, and brain  
142 imaging. All measures, including anthropometric, are collected by trained clinical research staff for  
143 use in the diagnosis and prediction of chronic illness.<sup>18</sup>

144

### 145 *PM<sub>2.5</sub> Exposure Assessment*

146

147 Due to evidence suggesting a relationship between both ambient PM<sub>2.5</sub> and traffic-related PM<sub>2.5</sub>  
148 exposure and cognitive decline, and because traffic-related PM<sub>2.5</sub> is a major exposure source in  
149 urban environments like Atlanta, GA,<sup>19</sup> we used both measures of PM<sub>2.5</sub> in our analyses.

150

151 We obtained ambient PM<sub>2.5</sub> exposure data from the publicly available Socioeconomic Data and  
152 Application Center (SEDAC) air quality data set for health-related applications.<sup>20</sup> The data set  
153 consists of yearly ambient PM<sub>2.5</sub> levels (in µg/m<sup>3</sup>) estimated at a 1 km spatial resolution using a well-  
154 validated ensemble-based prediction model for the contiguous United States (2000-2016). As  
155 described by Di *et al.* (2019), three machine-learning algorithms: random forest, neural network, and  
156 gradient boosting, were used to predict ambient PM<sub>2.5</sub> and included a variety of predictor variables  
157 from satellite data, land use, meteorological variables, and chemical transport model simulations.<sup>21</sup>

158 The ensemble model then combined these PM<sub>2.5</sub> predictions with a generalized additive model that  
159 allowed for the contribution of each machine-learning algorithm to vary by location.<sup>21</sup> The ensemble  
160 model was trained on PM<sub>2.5</sub> levels measured at 2,156 U.S. EPA monitors, validated with 10-fold  
161 cross-validation, and produced high-resolution annual PM<sub>2.5</sub> predictions with an average R<sup>2</sup> of 0.89.<sup>21</sup>  
162

163 As described previously,<sup>22</sup> traffic-related PM<sub>2.5</sub> exposure concentrations (in µg/m<sup>3</sup>) for the metro-  
164 Atlanta area for the period 2002 to 2019 were generated by two approaches. Briefly, for the 2002-  
165 2011 period, annual traffic-related PM<sub>2.5</sub> concentrations at 250 m resolution were generated by the  
166 Research LINE-sources dispersion (R-LINE) model and calibrated by measurements from local  
167 PM<sub>2.5</sub> ground monitoring sites.<sup>23,24</sup> For the 2012-2019 period, annual traffic-related PM<sub>2.5</sub>  
168 concentrations at 200-250 m resolution were predicted via a land-use random forest model built on  
169 training data comprised of the 2015 annual concentrations of traffic-related PM<sub>2.5</sub> from Atlanta  
170 Regional Commission, road inventory and traffic monitoring data based on measurements from the  
171 Georgia Department of Transportation which considered road geometry and traffic volume, land  
172 cover data from the National Land Cover Database, and ambient PM<sub>2.5</sub> data from Atmospheric  
173 Composition Analysis. The random forest model was trained with the R package *randomForest*. The  
174 resulting 200-250m resolution annual traffic-related PM<sub>2.5</sub> predictions had an average R<sup>2</sup> of 0.80.  
175 Both databases had spatial coverage of approximately 20 counties in GA. Given the reduced  
176 coverage of the traffic-related PM<sub>2.5</sub> exposure estimates compared to the ambient PM<sub>2.5</sub> data and the  
177 geographic spread of our study population, the analysis sample for these models included only the  
178 participants located within the metro-Atlanta area.  
179

180 For both ambient and traffic-related exposures, we spatially matched geocoded residential  
181 addresses to the closest centroid of grids (based on 1 km<sup>2</sup> or 200-250 m<sup>2</sup> grids) to assign annual  
182 exposures. We then calculated individual 3- and 5-year exposures by averaging yearly predictions  
183 prior to specimen collection.  
184

### 185 *AD CSF Biomarker Concentrations*

186

187 CSF biospecimens were collected by EHBS research staff via lumbar puncture, CSF collection  
188 protocol has been previously described.<sup>25</sup> Aβ<sub>42</sub>, tTau, and pTau CSF levels were quantified using the  
189 ElectroChemiLuminescence Immunoassay (ECLIA) Elecsys® AD CSF portfolio on an automated  
190 Roche Diagnostics instrument (F. Hoffman-La Roche Ltd). The assays have measuring ranges of  
191 200–1700 pg/mL (Aβ<sub>42</sub>), 80–1300 pg/mL (tTau) and 8–120 pg/mL (pTau). tTau and pTau levels were  
192 log-base<sub>10</sub> transformed for normality in linear models in the statistical analyses. We also examined  
193 CSF biomarker ratio outcomes, namely, tTau/Aβ<sub>42</sub> and pTau/Aβ<sub>42</sub>, which are highly predictive of  
194 amyloid positivity based on concordance with amyloid-PET, including for cognitively normal  
195 participants.<sup>26</sup> All AD CSF biomarker outcomes were kept as continuous variables for linear  
196 regression analyses and separately dichotomized based on the Elecsys® AD CSF portfolio positive  
197 (+) cut-offs for logistic regression analyses (Aβ<sub>42</sub> ≤1030 pg/mL; tTau >300 pg/mL; pTau >27 pg/mL;  
198 tTau/Aβ<sub>42</sub> >0.28pg/mL; pTau/Aβ<sub>42</sub> >0.023pg/mL).<sup>8,27</sup> The cut-off values for Aβ<sub>42</sub>, tTau/Aβ<sub>42</sub>, and  
199 pTau/Aβ<sub>42</sub> CSF were established and validated to demonstrate CSF biomarker concordance with  
200 amyloid-β PET visual read in the BioFINDER and ADNI studies, respectively.<sup>28</sup> Cut-off values for  
201 single tau biomarkers, tTau and pTau, were derived and validated in a separate study based on the  
202 separation between mild cognitive impairment (MCI) patients with a higher versus lower risk of  
203 cognitive decline, and optimized for identification of AD patients versus normal controls.<sup>29</sup>

204

## 205 *Covariates*

206

207 Sources of potential confounding were identified with a directed acyclic graph (DAG; **Figure S1**).  
208 Individual-level confounders were conceptualized as factors impacting both residential PM<sub>2.5</sub>  
209 exposure and the outcome measure. Potential confounding factors included in the analysis were  
210 gender, age, neighborhood socioeconomic status (N-SES), race/ethnicity, educational attainment,  
211 and body mass index (BMI). Due to historic racism and discriminatory land-use practices such as  
212 redlining, environmental exposures disproportionately affect low-income and minority populations.  
213 For this reason, neighborhood deprivation characteristics were also included as potential  
214 confounding variables and effect modifiers as done in our previous work.<sup>30</sup> Race has also been  
215 noted as an important factor when interpreting CSF biomarker results.<sup>31</sup> In addition, BMI influences  
216 biomarker concentrations and is also related to N-SES through characteristics such as neighborhood  
217 walkability, greenspace, and food access.<sup>32,33</sup>

218

219 Due to the presence of multi-ancestral groups and small categories in self-reported race/ethnicity,  
220 we used a 3-level race variable in the analysis: White/Caucasian, Black/African American, and  
221 Other, as well as a dichotomous ethnicity variable indicating Hispanic origin. Similarly, educational  
222 attainment was included as a 3-level variable: master or higher, college, less than college. Height  
223 and weight measurements were used to calculate body mass index (BMI, weight in kilograms  
224 divided by height in meters squared) which was used as a continuous variable in all models. N-SES  
225 for each participant was established in this study with census-tract level American Community  
226 Survey (ACS) defined principal components of neighborhood deprivation (see Li *et al.*<sup>30</sup> for details)  
227 and the Area Deprivation Index (ADI). As described previously in Li *et al.*,<sup>30</sup> three principal  
228 components of neighborhood deprivation were calculated based on estimates for 5-year ACS  
229 census-tract-level data, including 16 indicators of six socioeconomic domains (poverty/income, racial  
230 composition, education, employment, occupation, and housing properties) (**Figure S2**).<sup>30</sup> The ADI is  
231 provided in national percentile rankings at the block group level from 1 to 100, where 100 represents  
232 the most deprived neighborhood, and was calculated using census block group-level indicators and  
233 factor analysis to cluster indicators based on their ability to explain the variance between block  
234 groups.<sup>34</sup>

235

## 236 *Statistical Analyses*

237

238 We implemented multiple linear and logistic regression models to estimate the relationship between  
239 residential PM<sub>2.5</sub> exposure and AD CSF biomarker levels at enrollment. In these models, biomarker  
240 concentrations (linear regression models) or dichotomized AD positive variables (logistic regression  
241 models) were assigned as dependent variables and PM<sub>2.5</sub> exposures along with the selected  
242 confounding variables as independent variables. Since the biomarkers were measured on the same  
243 scales, but with different ranges, we standardized all continuous biomarker measures by converting  
244 them to z-scores prior to employing regression analysis to increase comparability of results across  
245 different biomarkers. Z-scores were computed for each observation by subtracting the sample mean  
246 from each individual value and subsequently dividing by the sample standard deviation. Further, we  
247 standardized the PM<sub>2.5</sub> estimates according to its distribution by dividing all PM<sub>2.5</sub> exposures of  
248 interest by the IQR of 1-year ambient or traffic-related PM<sub>2.5</sub> exposure respectively. The general form  
249 of the model for all analyses appears below:

250

251 AD CSF Biomarker Outcome =  $\alpha_0 + \beta_1 PM_{2.5} + \gamma_1 Age + \gamma_2 Gender + \gamma_3 Education +$   
252  $\gamma_4 Ethnicity + \gamma_5 BMI + \gamma_6 ADI + \gamma_7 nSES PC_1 + \gamma_8 nSES PC_2 + \gamma_9 nSES PC_3 + \varepsilon$

253

254 Where  $PM_{2.5}$  represents either ambient or traffic-related  $PM_{2.5}$  averages 1, 3, or 5 years prior to  
255 specimen collection and  $\varepsilon$  represents the random error term, with an assumed mean of zero and  
256 constant variance  $\sim N(0, \sigma^2)$ .

257

### 258 *Effect Modification Analyses*

259

260 We tested for effect modification by several well-established risk factors for AD, adding an  
261 interaction term between  $PM_{2.5}$  and each risk factor in individual regression models. These risk  
262 factors included whether a participant had at least one *APOE-ε4* allele, family history of AD  
263 (indicated by parent or first-sibling diagnosis), gender, age, and ADI. Despite a hypothesized  
264 additive genetic effect of the  $\varepsilon 4$  allele, statistical interaction was assessed dichotomously due to the  
265 small number of homozygous  $\varepsilon 4$  carriers (2.1%; **Table 1**). Family history of AD (no/yes), gender  
266 (male/female), and ADI (<50/≥50) were also added as dichotomous variables while interaction with  
267 age was assessed continuously. Using the models with interaction, we then tested for effect  
268 modification with the *interplot* R package and n=100,000 simulations.

269

270 For all statistical analysis, we used R Statistical Software version 4.2.2, and the significance level  
271  $\alpha=0.05$ .

272

## 273 **Results**

274

### 275 *Study Population*

276

277 After excluding EHBS participants with missing demographic data (n=46), the analytic sample  
278 included 1,113 individuals (**Table 1**). Participants lived primarily around the Atlanta metropolitan  
279 area, spanning 489 census blocks in the state of Georgia (detailed neighborhood characteristics are  
280 summarized in **Table S6**). The average age of our sample was 61.7 years (SD=6.73), 69.9% were  
281 females, and 84.7% identified as White/Caucasian, 10.9% identified as Black/African American, and  
282 only 2.9% identified as Hispanic. The average BMI was 25.5 kg/m<sup>2</sup> (SD=3.55). Our sample was  
283 highly educated with 86.7% having received an associate degree or higher. The ADI was right  
284 skewed with a median of 25, indicating half of the sample is in 25% lower deprivation than the  
285 national average.

286

287 There was spatial variability in ambient  $PM_{2.5}$  levels in our study area, with the highest quintile of  
288 exposure (10.1-13.21  $\mu\text{g}/\text{m}^3$ ) localized to the south of the city of Atlanta and lowest quintile of  
289 exposure (5.63-8.98  $\mu\text{g}/\text{m}^3$ ) localized to communities north of Atlanta such as Marietta and Roswell  
290 (**Figure 1, Table 1**). Traffic-related  $PM_{2.5}$  exposure levels had lower concentrations (since we only  
291 estimated the traffic-related component of  $PM_{2.5}$ ) but higher variability with annual average  
292 exposures of 1.15  $\mu\text{g}/\text{m}^3$  (SD=0.46) compared with annual average ambient exposures of 9.52  
293  $\mu\text{g}/\text{m}^3$  (SD=0.76). Traffic-related  $PM_{2.5}$  estimates had a maximum of 5.10  $\mu\text{g}/\text{m}^3$  and these levels  
294 were localized exclusively to the city of Atlanta. Annual ambient and traffic-related  $PM_{2.5}$  exposure  
295 concentrations were weakly correlated (Pearson correlation = 0.36). More details on the distribution

296 of and relation between ambient and traffic-related PM<sub>2.5</sub> exposure concentrations are provided in  
297 the supplemental material (**Figures S3 and S4**).

298  
299 We observed a wide spread of concentrations for CSF A $\beta$ <sub>42</sub> in the study population (median A $\beta$ <sub>42</sub>  
300 level = 1210, IQR = 692.3). A $\beta$ <sub>42</sub> concentrations did not show a major departure from normality,  
301 except for the highest level which had a very high frequency, indicating normal A $\beta$ <sub>42</sub> concentrations  
302 in most participants, but tTau and pTau distributions were skewed (**Figure S5**). After log  
303 transformation, Tau concentrations were approximately normally distributed (**Figure S6**).  
304 Approximately 36% of participants had A $\beta$ <sub>42</sub> concentrations less than or equal to 1030 pg/mL which  
305 corresponds, on average, to a positive reading for AD as indicated by Elecsys<sup>®</sup> AD CSF portfolio  
306 positive (+) cut-offs. We observed AD positive readings for tTau and pTau cut-offs in 6% of the study  
307 population. Based on the pTau/A $\beta$ <sub>42</sub> ratio AD (+) positive cut-off, we detected amyloid-positivity in  
308 10.6% of participants. Details on the distributions of AD CSF biomarker concentrations and the  
309 frequency of biomarker-positivity detected among participants are provided in **Table 2**.

310  
311 *PM<sub>2.5</sub> and AD CSF biomarkers*

312  
313 Among the continuous AD CSF biomarkers, higher levels of 1- and 3-year ambient PM<sub>2.5</sub> exposures  
314 were associated with lower A $\beta$ <sub>42</sub> CSF concentrations at baseline after adjusting for potential  
315 confounding variables (**Figure 2A**). Specifically, an IQR (0.845  $\mu\text{g}/\text{m}^3$ ) increase in the 1- or 3-year  
316 ambient PM<sub>2.5</sub> exposure was significantly associated with a -0.09 (95% CI: -0.15, -0.02) and -0.07  
317 (95% CI: -0.13, -0.005) decrease in A $\beta$ <sub>42</sub> CSF z-score, respectively, after confounder-adjustment.  
318 The associations of 5-year ambient PM<sub>2.5</sub> (**Figure 2A**) and traffic-related PM<sub>2.5</sub> (**Figure 2F**) and A $\beta$ <sub>42</sub>  
319 CSF were similar, but not significant. No significant associations were detected between ambient  
320 (**Figure 2B-E**) or traffic-related (**Figure 2G-J**) PM<sub>2.5</sub> exposures and tTau, pTau, tTau/A $\beta$ <sub>42</sub>, or  
321 pTau/A $\beta$ <sub>42</sub> CSF concentrations at enrollment, but associations with tTau/A $\beta$ <sub>42</sub> and pTau/A $\beta$ <sub>42</sub> were  
322 similar to those of A $\beta$ <sub>42</sub> and consistent with AD-related pathology (**Figure 2I-J**).

323  
324 For the AD CSF biomarker positive cut-off outcomes, higher residential ambient PM<sub>2.5</sub> exposures  
325 were associated with increased prevalence of an AD positive (+) A $\beta$ <sub>42</sub> portfolio reading at baseline  
326 with statistically significant associations for an IQR (0.845  $\mu\text{g}/\text{m}^3$ ) increase in 1-year (OR=1.23; 95%  
327 CI: 1.07, 1.42), 3-year (OR=1.20; 95% CI: 1.04, 1.37), and 5-year (OR=1.21; 95% CI: 1.04, 1.40)  
328 average ambient PM<sub>2.5</sub> exposure (**Figure 3A**). The associations between traffic-related PM<sub>2.5</sub>  
329 exposures and an AD positive (+) A $\beta$ <sub>42</sub> portfolio reading at enrollment were similar but not significant  
330 (**Figure 3F**). We further observed significant associations between 3- and 5-year traffic-related PM<sub>2.5</sub>  
331 exposures and an AD (+) pTau/A $\beta$ <sub>42</sub> ratio reading at enrollment, but not for 1-year traffic-related  
332 PM<sub>2.5</sub> exposure (**Figure 3J**) or ambient PM<sub>2.5</sub> exposure (**Figure 3E**), and while not significant, these  
333 results were consistent with those of tTau/A $\beta$ <sub>42</sub> (**Figure 3I, Figure 3D**). We did not observe  
334 statistically significant associations between ambient (**Figure 3B-C**) or traffic-related (**Figure 3G-H**)  
335 PM<sub>2.5</sub> exposures and AD positive (+) tTau or pTau cut-offs.

336  
337 The associations between ambient PM<sub>2.5</sub> and A $\beta$ <sub>42</sub> CSF concentrations and AD positive (+) A $\beta$ <sub>42</sub>  
338 portfolio reading remained significant even after restricting our sample size to only those located in  
339 the metro-Atlanta area (**Figure S7, Tables S1, S2, and S3**), which is the subsample for which traffic-  
340 related PM<sub>2.5</sub> exposures estimates were available (sample size reduced from N<sub>ambient</sub>=1,113 to  
341 N<sub>traffic</sub>=1,080).

342  
343 *Effect modification by other common risk factors for AD*  
344



345 The association of annual average ambient PM<sub>2.5</sub> exposure and concentrations of Aβ<sub>42</sub> CSF was not  
346 significantly modified by APOE-ε4 carriership (p = 0.59), AD family history (p = 0.37), ADI (p = 0.62)  
347 or gender (p = 0.67) (**Figure 4A-D, Table S4**). Similarly, the association of annual average ambient  
348 PM<sub>2.5</sub> exposure and AD positive (+) Aβ<sub>42</sub> portfolio reading was not significantly modified by APOE-ε4  
349 carriership (p = 0.80), AD family history (p = 0.27), ADI (p = 0.12) or gender (p = 0.72) (**Figure S8A-**  
350 **D, Table S5**). Effect modification by age was also not statistically significant (p=0.17), but we  
351 observed an increasing negative effect of PM<sub>2.5</sub> on Aβ<sub>42</sub> CSF levels with increasing age, and  
352 significant associations between PM<sub>2.5</sub> and Aβ<sub>42</sub> CSF levels starting around 60 years of age (**Figure**  
353 **4E**); a similar pattern was revealed when looking at the stratified effects of PM<sub>2.5</sub> on AD positive (+)  
354 Aβ<sub>42</sub> portfolio reading by age (interaction p=0.34) (**Figure S8E**).

355  
356

## 357 Discussion

358

359 In the present study, we examined the impacts of both ambient PM<sub>2.5</sub> exposure and traffic-related  
360 PM<sub>2.5</sub>, a major source of ambient PM<sub>2.5</sub> in urban environments, on CSF biomarkers of AD in 1,113  
361 cognitively healthy individuals. Our findings show associations between long-term ambient PM<sub>2.5</sub>  
362 concentrations and decreased Aβ<sub>42</sub> AD CSF biomarker concentrations (significant for 1- and 3-year  
363 average exposures), as well as increased likelihood of an Aβ<sub>42</sub> AD (+) positive portfolio reading  
364 (significant for 1-, 3- and 5-year average exposures). We further found significant associations  
365 between 3- and 5-year traffic-related PM<sub>2.5</sub> exposure estimates and a pTau/Aβ<sub>42</sub> (+) positive portfolio  
366 reading at enrollment, but not with ambient PM<sub>2.5</sub> exposure. We found no associations between  
367 ambient or traffic-related PM<sub>2.5</sub> exposures and pTau or tTau continuous concentrations or their ratios  
368 with Aβ<sub>42</sub>, however, the directions of effect for pTau/Aβ<sub>42</sub> and tTau/Aβ<sub>42</sub> continuous ratio outcomes  
369 were consistent with AD-related amyloid pathology. Further, while not statistically significant, the  
370 strength of the association between annual ambient PM<sub>2.5</sub> exposure and Aβ<sub>42</sub> AD CSF  
371 concentrations differed by age and was particularly pronounced for individuals over the age of 60.

372

373 The observed associations between PM<sub>2.5</sub> exposure and the Aβ<sub>42</sub> AD CSF biomarker as well as  
374 pTau/Aβ<sub>42</sub> positive portfolio readings, which are equally predictive of amyloid PET status (+/-) as Aβ  
375 ratio outcomes,<sup>35</sup> among cognitively healthy older adults is consistent with evidence from existing  
376 literature. Signs of AD can be detected in the early stages of the AD continuum,<sup>17</sup> and decreases in  
377 CSF concentrations of Aβ<sub>42</sub> (a marker of amyloidosis) and elevation in tau species (phosphorylated  
378 and total tau) are well-established as pathogenic biomarkers in AD diagnosis.<sup>36</sup> To date, there have  
379 been few studies estimating the effects of PM<sub>2.5</sub> exposure on certified biomarkers of AD in healthy,  
380 aging populations. One study found a similar relationship between air pollution exposure and Aβ<sub>42</sub>,  
381 although they used CSF Aβ<sub>42/40</sub> ratio to reflect Aβ pathology rather than the individual biomarker  
382 measurements.<sup>15</sup> Their estimates were similarly negative, but did not reach significance, likely owing  
383 to the relatively small sample size (N=147).<sup>15</sup> Another study<sup>14</sup> found a statistically significant total  
384 effect of ambient PM<sub>2.5</sub> on Aβ<sub>42</sub> CSF as well as pTau/Aβ<sub>42</sub> concentrations among N=1,131  
385 cognitively healthy older individuals, which was further mediated by a CSF biomarker of  
386 neuroinflammation, sTREM2.<sup>14</sup>

387

388 We found mostly null associations between 1-, 3-, and 5-year average ambient and traffic-related  
389 PM<sub>2.5</sub> exposures and tTau as well as pTau concentrations at enrollment, except for the model with 3-  
390 year ambient PM<sub>2.5</sub> and tTau levels, in which we found a significant negative association. The  
391 direction of estimates for tau biomarkers are expected to be positive for AD-related change.  
392 Associations between PM<sub>2.5</sub> and tau biomarkers diminished when taking AD CSF cut-offs into  
393 account, suggesting that the negative association with the continuous tTau levels was a false

394 positive finding. Other studies examining the associations between air pollution and CSF biomarkers  
395 of AD in cognitively healthy adults report similar findings, where both Alemany *et al.* (2021) and Li *et*  
396 *al.* (2022) found null associations between PM<sub>2.5</sub> and pTau as well as tTau CSF concentrations.<sup>14, 15</sup>  
397

398 Stronger associations were detected between ambient PM<sub>2.5</sub> and AD CSF biomarkers as compared  
399 with traffic-related PM<sub>2.5</sub> exposure. Ambient PM<sub>2.5</sub> contains emissions from traffic, industry, domestic  
400 fuel burning, natural sources including soil dust and sea salt, as well as unspecific sources of human  
401 origin.<sup>37</sup> On the other hand, traffic-related PM<sub>2.5</sub> is a source of ambient PM<sub>2.5</sub> that includes emissions  
402 of organic and inorganic gaseous PM precursors from the combustion of fuels and lubricants.<sup>37</sup>  
403 Since both sources contain organic and often toxic particles, we expected to see relationships  
404 between both sources of PM<sub>2.5</sub> and AD CSF biomarkers, and while not significant for A $\beta$ <sub>42</sub>, the  
405 associations between traffic-related PM<sub>2.5</sub> and AD CSF biomarkers were similar to associations with  
406 ambient PM<sub>2.5</sub>. More research needs to be done to determine which PM<sub>2.5</sub> mixtures are particularly  
407 harmful to the central nervous system.  
408

409 While we did not find effect modifications by *APOE*- $\epsilon$ 4 carriership or other common risk factors for  
410 AD, the association between ambient PM<sub>2.5</sub> exposure and A $\beta$ <sub>42</sub> CSF became stronger with  
411 increasing age (though not statistically significant). These results could suggest that AD CSF  
412 biomarkers might not be sensitive enough to detect AD-related changes in participants < 60 years  
413 old, but more research in the population will clarify the most clinically relevant age for biomarker  
414 measurement. Previous research suggests that biomarker patterns of A $\beta$ <sub>42</sub> consistent with stage 1  
415 AD (amyloid pathology only) are first detectable during early middle age (45-54 years), while  
416 increases in tTau and pTau are typically not apparent until later (ages  $\geq$  55 years).<sup>38</sup> However, this  
417 previous study used an unstandardized assay, the INNOTEST ELISA, which often yields systematic  
418 variability in comparison to the Elecsys assay. Another potential explanation for the stronger  
419 associations among participants older than 60 years could be the higher accumulative PM<sub>2.5</sub>  
420 exposure over the lifetime among older individuals. In line with this hypothesis, one study examining  
421 the relationship between PM<sub>2.5</sub> exposure and AD prevalence found a stronger effect of PM<sub>2.5</sub> on AD  
422 prevalence among those at or above 70 years of age.<sup>3</sup>  
423

424 There are several strengths to be noted, such as, the exposure assessment which included two  
425 sources of PM<sub>2.5</sub>, ambient and traffic-related, which were estimated at a high spatial resolution of up  
426 to 200m; our outcome assessment which relied on a recommended assay for AD CSF biomarker  
427 measurement,<sup>16</sup> and for which we observed consistent associations using continuous biomarker  
428 concentrations as well as AD positivity cut-offs; our inclusion of several well-known confounders and  
429 methods to reduce confounding by neighborhood-level characteristics; and our relatively large  
430 sample size (N=1,113) of CSF measurements from cognitively healthy older adults free of chronic  
431 illness.  
432

433 In addition to its strengths, this study has several limitations. Given that ADRD progresses over the  
434 course of several years or decades, we evaluated the associations with 3- and 5-year average PM<sub>2.5</sub>  
435 concentrations prior to enrollment in addition to the 1-year averages. However, given that exposure  
436 was assigned based on the baseline residence and some participants could have relocated in the  
437 years prior to the study, the 3- and 5-year estimates may be affected by exposure misclassification.  
438 Such exposure misclassification is also a potential explanation for the weaker associations between  
439 the 3- and 5-year PM<sub>2.5</sub> exposures and A $\beta$ <sub>42</sub> CSF concentrations in comparison to the 1-year  
440 exposure concentrations. Our study also only used cross-sectional CSF measurements; longitudinal  
441 repeated measures analyses may provide a better understanding of the long-term effect of air  
442 pollution on CSF biomarker trajectories of AD. Further, our sample was not representative of the

443 Atlanta metropolitan area, the target population, as it was mainly high SES and white, which limits  
444 both the generalizability and transportability of our estimates. Finally, while we looked at two different  
445 sources of PM<sub>2.5</sub>, we did not examine the relationship between AD pathology and specific  
446 components of PM<sub>2.5</sub>. Future studies should consider the components of PM<sub>2.5</sub> as they are dynamic  
447 between ambient and traffic-related sources with different toxicity<sup>39</sup> and could reveal important and  
448 undiscovered relationships between exposure and disease pathogenesis.

449  
450 In conclusion, our results suggest that exposure to ambient and traffic-related PM<sub>2.5</sub>, even at levels  
451 below current primary and secondary standards defined by the Environmental Protection Agency  
452 (EPA) for PM<sub>2.5</sub> (annual average standards with levels of 12.0 µg/m<sup>3</sup> and 15.0 µg/m<sup>3</sup>, respectively),  
453 increases the risk of future AD development. Additionally, our results add to the growing body of  
454 evidence which suggests that air pollution directly contributes to neurodegeneration by accelerating  
455 Aβ<sub>42</sub> accumulation in the brain.<sup>2,40</sup>

456 **References**

- 457
- 458 1. Weuve, J., et al., *Exposure to Air Pollution in Relation to Risk of Dementia and Related Outcomes: An Updated Systematic Review of the Epidemiological Literature*. *Environ Health Perspect*, 2021. 459 **129**(9): p. 96001.
  - 460
  - 461 2. Thiankhw, K., N. Chattipakorn, and S.C. Chattipakorn, *PM2.5 exposure in association with AD-* 462 *related neuropathology and cognitive outcomes*. *Environ Pollut*, 2022. **292**(Pt A): p. 118320.
  - 463 3. Yang, L., et al., *Associations between PM(2.5) exposure and Alzheimer's Disease prevalence* 464 *Among elderly in eastern China*. *Environ Health*, 2022. **21**(1): p. 119.
  - 465 4. Delgado-Saborit, J.M., et al., *A critical review of the epidemiological evidence of effects of air* 466 *pollution on dementia, cognitive function and cognitive decline in adult population*. *Sci Total* 467 *Environ*, 2021. **757**: p. 143734.
  - 468 5. Goodman, R.A., et al., *Prevalence of dementia subtypes in United States Medicare fee-for-service* 469 *beneficiaries, 2011-2013*. *Alzheimers Dement*, 2017. **13**(1): p. 28-37.
  - 470 6. Li, W., et al., *A review of respirable fine particulate matter (PM(2.5))-induced brain damage*. 471 *Front Mol Neurosci*, 2022. **15**: p. 967174.
  - 472 7. Huang, W.J., X. Zhang, and W.W. Chen, *Role of oxidative stress in Alzheimer's disease*. *Biomed* 473 *Rep*, 2016. **4**(5): p. 519-522.
  - 474 8. Jack, C.R., Jr., et al., *NIA-AA Research Framework: Toward a biological definition of Alzheimer's* 475 *disease*. *Alzheimers Dement*, 2018. **14**(4): p. 535-562.
  - 476 9. Hajat, A., et al., *Air pollution and plasma amyloid beta in a cohort of older adults: Evidence from* 477 *the Ginkgo Evaluation of Memory study*. *Environ Int*, 2023. **172**: p. 107800.
  - 478 10. Klyucherev, T.O., et al., *Advances in the development of new biomarkers for Alzheimer's disease*. 479 *Transl Neurodegener*, 2022. **11**(1): p. 25.
  - 480 11. Bartels, C., et al., *Use of Cerebrospinal Fluid Biomarkers of Alzheimer's Disease Risk in Mild* 481 *Cognitive Impairment and Subjective Cognitive Decline in Routine Clinical Care in Germany*. *J* 482 *Alzheimers Dis*, 2020. **78**(3): p. 1137-1148.
  - 483 12. Bateman, R.J., et al., *Clinical and biomarker changes in dominantly inherited Alzheimer's disease*. 484 *N Engl J Med*, 2012. **367**(9): p. 795-804.
  - 485 13. Bouwman, F.H., et al., *Clinical application of CSF biomarkers for Alzheimer's disease: From* 486 *rationale to ratios*. *Alzheimers Dement (Amst)*, 2022. **14**(1): p. e12314.
  - 487 14. Li, M., et al., *Association between air pollution and CSF sTREM2 in cognitively normal older* 488 *adults: The CABLE study*. *Ann Clin Transl Neurol*, 2022. **9**(11): p. 1752-1763.
  - 489 15. Alemany, S., et al., *Associations between air pollution and biomarkers of Alzheimer's disease in* 490 *cognitively unimpaired individuals*. *Environ Int*, 2021. **157**: p. 106864.
  - 491 16. Dakterzada, F., et al., *Assessment of the Concordance and Diagnostic Accuracy Between Elecsys* 492 *and Lumipulse Fully Automated Platforms and Innostest*. *Front Aging Neurosci*, 2021. **13**: p. 493 604119.
  - 494 17. Schindler, S.E., et al., *Cerebrospinal fluid biomarkers measured by Elecsys assays compared to* 495 *amyloid imaging*. *Alzheimers Dement*, 2018. **14**(11): p. 1460-1469.
  - 496 18. Goetz, M.E., et al., *Rationale and Design of the Emory Healthy Aging and Emory Healthy Brain* 497 *Studies*. *Neuroepidemiology*, 2019. **53**(3-4): p. 187-200.
  - 498 19. Kheirbek, I., et al., *The contribution of motor vehicle emissions to ambient fine particulate matter* 499 *public health impacts in New York City: a health burden assessment*. *Environ Health*, 2016. **15**(1): 500 p. 89.
  - 501 20. Di, Q., et al., *Daily and Annual PM2.5 Concentrations for the Contiguous United States, 1-km* 502 *Grids, v1 (2000 - 2016)*. 2021, NASA Socioeconomic Data and Applications Center (SEDAC): 503 Palisades, New York.

- 504 21. Di, Q., et al., *An ensemble-based model of PM(2.5) concentration across the contiguous United States with high spatiotemporal resolution*. Environ Int, 2019. **130**: p. 104909.
- 505
- 506 22. Christensen, G.M., et al., *Fine particulate air pollution and neuropathology markers of*
- 507 *Alzheimer's disease in donors with and without APOE epsilon4 alleles - results from an autopsy*
- 508 *cohort*. medRxiv, 2023.
- 509 23. Jeremy A. Sarnat, A.T.R., Donghai Liang, Jennifer L. Moutinho, Rachel Golan, Rodney J. Weber,
- 510 Dong Gao, Stefanie Ebel Sarnat, Howard H. Chang, Roby Greenwald, Tianwei Yu, *Developing*
- 511 *Multipollutant Exposure Indicators of Traffic Pollution: The Dorm Room Inhalation to Vehicle*
- 512 *Emissions (DRIVE) Study*. Res Rep Health Eff Inst., 2018. **Research Report 196**.
- 513 24. Zhai, X.R., G. A.; Sampath, P.; Mulholland, A. J.; Kim, B; Kim, Y.; D'Onofrio, D., *Calibrating R-LINE*
- 514 *model results with observational data to develop annual mobile source air pollutant fields at fine*
- 515 *spatial resolution: Application in Atlanta*. Atmospheric Environment, 2016. **147**: p. 446-457.
- 516 25. Teunissen, C.E., et al., *A consensus protocol for the standardization of cerebrospinal fluid*
- 517 *collection and biobanking*. Neurology, 2009. **73**(22): p. 1914-22.
- 518 26. Doecke, J.D., et al., *Elecsys CSF biomarker immunoassays demonstrate concordance with*
- 519 *amyloid-PET imaging*. Alzheimers Res Ther, 2020. **12**(1): p. 36.
- 520 27. Ltd, F.H.-L.R. *The Power of Elecsys® in Alzheimer's disease*. 2023; Available from:
- 521 [https://diagnostics.roche.com/global/en/article-listing/health-topics/neurology/the-power-of-](https://diagnostics.roche.com/global/en/article-listing/health-topics/neurology/the-power-of-elecsys-in-alzheimers-disease.html)
- 522 [elecsys-in-alzheimers-disease.html](https://diagnostics.roche.com/global/en/article-listing/health-topics/neurology/the-power-of-elecsys-in-alzheimers-disease.html).
- 523 28. Hansson, O., et al., *CSF biomarkers of Alzheimer's disease concord with amyloid-beta PET and*
- 524 *predict clinical progression: A study of fully automated immunoassays in BioFINDER and ADNI*
- 525 *cohorts*. Alzheimers Dement, 2018. **14**(11): p. 1470-1481.
- 526 29. Blennow, K., et al., *Predicting clinical decline and conversion to Alzheimer's disease or dementia*
- 527 *using novel Elecsys Abeta(1-42), pTau and tTau CSF immunoassays*. Sci Rep, 2019. **9**(1): p. 19024.
- 528 30. Li, Z., et al., *Neighborhood characteristics as confounders and effect modifiers for the association*
- 529 *between air pollution exposure and subjective cognitive functioning*. Environ Res, 2022. **212**(Pt
- 530 A): p. 113221.
- 531 31. Garrett, S.L., et al., *Racial Disparity in Cerebrospinal Fluid Amyloid and Tau Biomarkers and*
- 532 *Associated Cutoffs for Mild Cognitive Impairment*. JAMA Netw Open, 2019. **2**(12): p. e1917363.
- 533 32. Ewers, M., et al., *Body mass index is associated with biological CSF markers of core brain*
- 534 *pathology of Alzheimer's disease*. Neurobiol Aging, 2012. **33**(8): p. 1599-608.
- 535 33. Fan, J.X., M. Wen, and K. Li, *Associations between obesity and neighborhood socioeconomic*
- 536 *status: Variations by gender and family income status*. SSM Popul Health, 2020. **10**: p. 100529.
- 537 34. Singh, G.K., *Area deprivation and widening inequalities in US mortality, 1969-1998*. Am J Public
- 538 Health, 2003. **93**(7): p. 1137-43.
- 539 35. Campbell, M.R., et al., *P-tau/Abeta42 and Abeta42/40 ratios in CSF are equally predictive of*
- 540 *amyloid PET status*. Alzheimers Dement (Amst), 2021. **13**(1): p. e12190.
- 541 36. Hansson, O., et al., *Advantages and disadvantages of the use of the CSF Amyloid beta (Abeta)*
- 542 *42/40 ratio in the diagnosis of Alzheimer's Disease*. Alzheimers Res Ther, 2019. **11**(1): p. 34.
- 543 37. Karagulian, F., et al., *Contributions to cities' ambient particulate matter (PM): A systematic*
- 544 *review of local source contributions at global level*. Atmospheric Environment, 2015. **120**: p. 475-
- 545 483.
- 546 38. Sutphen, C.L., et al., *Longitudinal Cerebrospinal Fluid Biomarker Changes in Preclinical Alzheimer*
- 547 *Disease During Middle Age*. JAMA Neurol, 2015. **72**(9): p. 1029-42.
- 548 39. Xu, J., et al., *Photochemical impacts on the toxicity of PM2.5*. Critical Reviews in Environmental
- 549 Science and Technology, 2022. **52**(1): p. 130-156.
- 550 40. You, R., Y.S. Ho, and R.C. Chang, *The pathogenic effects of particulate matter on*
- 551 *neurodegeneration: a review*. J Biomed Sci, 2022. **29**(1): p. 15.
- 552

553 **Table 1** Baseline descriptive characteristics for EHBS study participants (≥45 years of age).

| Characteristics <sup>d</sup>                             | Overall<br>(N=1113) |
|----------------------------------------------------------|---------------------|
| <b>Age (years)</b>                                       |                     |
| Mean (SD)                                                | 61.7 (6.73)         |
| Median [Min, Max]                                        | 62.0 [45.0, 77.0]   |
| <b>Gender</b>                                            |                     |
| Female                                                   | 775 (69.6%)         |
| <b>Body Mass Index (kg/m<sup>2</sup>)</b>                |                     |
| Mean (SD)                                                | 25.5 (3.55)         |
| Median [Min, Max]                                        | 25.3 [16.8, 38.4]   |
| <b>Race/Ethnicity<sup>a</sup></b>                        |                     |
| White/Caucasian                                          | 943 (84.7%)         |
| Black/African American                                   | 121 (10.9%)         |
| Other                                                    | 49 (4.4%)           |
| <b>Hispanic</b>                                          |                     |
| Yes                                                      | 32 (2.9%)           |
| <b>Educational Attainment<sup>b</sup></b>                |                     |
| Less than college                                        | 147 (13.2%)         |
| College                                                  | 478 (42.9%)         |
| Master or higher                                         | 488 (43.8%)         |
| <b>Area Deprivation Index<sup>c</sup></b>                |                     |
| Mean (SD)                                                | 29.4 (20.1)         |
| Median [Min, Max]                                        | 25.0 [1.00, 93.0]   |
| <b>APOE-ε4 allele carriership</b>                        |                     |
| No allele                                                | 591 (53.1%)         |
| 1 allele                                                 | 241 (21.7%)         |
| 2 alleles                                                | 23 (2.1%)           |
| Missing                                                  | 258 (23.2%)         |
| <b><u>Air pollution concentration</u></b>                |                     |
| <b>1 yr. ambient PM<sub>2.5</sub> (µg/m<sup>3</sup>)</b> |                     |
| Mean (SD)                                                | 9.52 (0.764)        |
| Median [Min, Max]                                        | 9.52 [5.63, 13.2]   |
| IQR                                                      | 0.845               |
| <b>3 yr. ambient PM<sub>2.5</sub> (µg/m<sup>3</sup>)</b> |                     |
| Mean (SD)                                                | 9.85 (0.832)        |

| Characteristics <sup>d</sup>                             | Overall<br>(N=1113) |
|----------------------------------------------------------|---------------------|
| Median [Min, Max]                                        | 9.96 [5.99, 12.0]   |
| IQR                                                      | 1.10                |
| <b>5 yr. ambient PM<sub>2.5</sub> (µg/m<sup>3</sup>)</b> |                     |
| Mean (SD)                                                | 9.96 (0.735)        |
| Median [Min, Max]                                        | 10.1 [6.41, 12.0]   |
| IQR                                                      | 0.945               |
| <b>1 yr. traffic PM<sub>2.5</sub> (µg/m<sup>3</sup>)</b> |                     |
| Mean (SD)                                                | 1.15 (0.464)        |
| Median [Min, Max]                                        | 1.10 [0.155, 5.06]  |
| IQR                                                      | 0.523               |
| Missing <i>n</i> (%)                                     | 33 (3.0%)           |
| <b>3 yr. traffic PM<sub>2.5</sub> (µg/m<sup>3</sup>)</b> |                     |
| Mean (SD)                                                | 1.26 (0.455)        |
| Median [Min, Max]                                        | 1.23 [0.175, 5.56]  |
| IQR                                                      | 0.479               |
| Missing <i>n</i> (%)                                     | 33 (3.0%)           |
| <b>5 yr. traffic PM<sub>2.5</sub> (µg/m<sup>3</sup>)</b> |                     |
| Mean (SD)                                                | 1.25 (0.432)        |
| Median [Min, Max]                                        | 1.21 [0.168, 5.38]  |
| IQR                                                      | 0.447               |
| Missing <i>n</i> (%)                                     | 33 (3.0%)           |

554 <sup>a</sup>Self-reported race/ethnicity was categorized into 3 groups: White/Caucasian,  
 555 Black/African American, and Other which includes both minority and mixed ancestry  
 556 groups.

557 <sup>b</sup>Educational attainment was self-report and included less than high school, high  
 558 school/GED, some college, associate's degree, bachelor's degree, master's degree, and  
 559 a professional degree (e.g., Ph.D.).

560 <sup>c</sup>Derived from factor analysis and validated to the Census Block Group neighborhood  
 561 level with factors for the theoretical domains of income, education, employment, and  
 562 housing quality; higher scores indicate higher levels of "disadvantage."

563 <sup>d</sup>Abbreviations: yr., Year; SD, standard deviation; Min, minimum; Max, maximum; IQR,  
 564 interquartile range; µg, Microgram; m<sup>3</sup>, meters cubed.

565

566 **Table 2** Baseline AD CSF Outcomes at enrollment between 2016 and 2020.

| <b>AD CSF concentrations and (+) cut-off</b>         | <b>Total<br/>(N=1113)</b> |
|------------------------------------------------------|---------------------------|
| <b>A<math>\beta</math><sub>42</sub> (pg/mL)</b>      |                           |
| Mean (SD)                                            | 1200 (382)                |
| Median [Min, Max]                                    | 1210 [200, 1700]          |
| IQR                                                  | 692.3                     |
| <b>tTau (pg/mL)</b>                                  |                           |
| Mean (SD)                                            | 187 (70.9)                |
| Median [Min, Max]                                    | 174 [80.0, 799]           |
| IQR                                                  | 79.6                      |
| <b>pTau (pg/mL)</b>                                  |                           |
| Mean (SD)                                            | 16.7 (7.16)               |
| Median [Min, Max]                                    | 15.2 [8.00, 83.8]         |
| IQR                                                  | 7.63                      |
| <b>tTau/A<math>\beta</math><sub>42</sub> (pg/mL)</b> |                           |
| Mean (SD)                                            | 0.171 (0.107)             |
| Median [Min, Max]                                    | 0.141 [0.0818, 1.72]      |
| <b>pTau/A<math>\beta</math><sub>42</sub> (pg/mL)</b> |                           |
| Mean (SD)                                            | 0.0154 (0.0116)           |
| Median [Min, Max]                                    | 0.0123 [0.00692, 0.200]   |
| <b>A<math>\beta</math><sub>42</sub></b>              |                           |
| (+)                                                  | 402 (36.1%)               |
| <b>tTau</b>                                          |                           |
| (+)                                                  | 68 (6.1%)                 |
| <b>pTau</b>                                          |                           |
| (+)                                                  | 65 (5.8%)                 |
| <b>tTau/A<math>\beta</math><sub>42</sub></b>         |                           |
| (+)                                                  | 87 (7.8%)                 |
| <b>pTau/A<math>\beta</math><sub>42</sub></b>         |                           |
| (+)                                                  | 118 (10.6%)               |

567 <sup>a</sup>AD CSF portfolio positive (+) vs (-) cut-offs (A $\beta$ <sub>42</sub> ≤1030 pg/ml; tTau >300 pg/mL;

568 pTau >27 pg/mL; tTau/A $\beta$ <sub>42</sub> >0.28pg/mL; pTau/A $\beta$ <sub>42</sub> >0.023pg/mL)

569



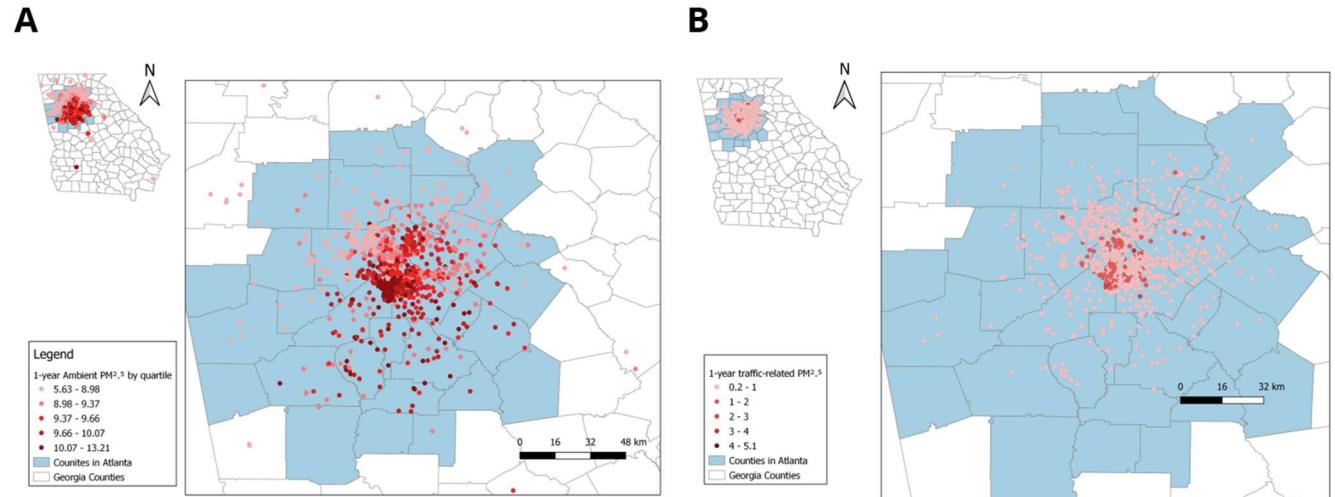

570  
571 **Figure 1** Map of the geographic distribution, each dot representing a study participant, of our study  
572 population and annual ambient residential  $PM_{2.5}$  (in  $\mu g/m^3$ ) exposure by quartile **(A)** (N=1,113) or  
573 annual traffic-related residential  $PM_{2.5}$  exposure (min-max) with easy breaks **(B)** (N=1,080).  
574  
575  
576  
577

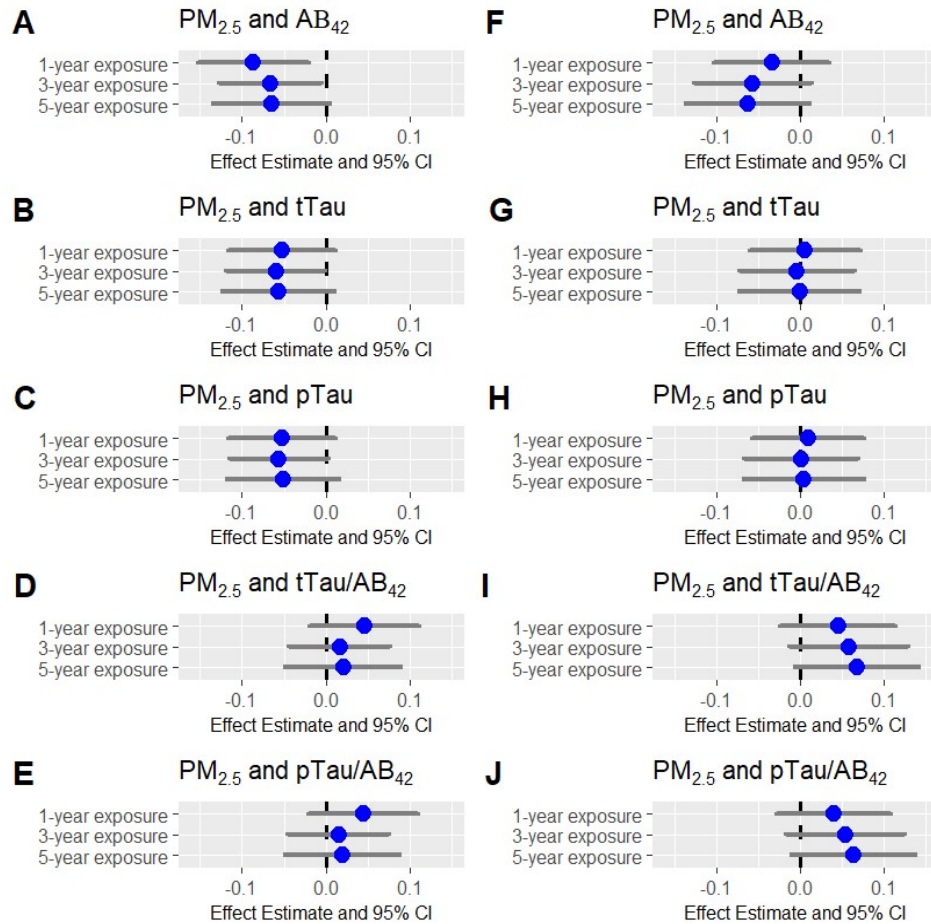

578  
579 **Figure 2** Effect Estimate ( $\pm$  95% CI) of 1, 3, and 5-year ambient (**A–E**) (N=1,113) and traffic-related  
580 (**F–J**) (N=1,080)  $PM_{2.5}$  exposure on AD CSF Biomarker concentrations (in pg/mL) ( $A\beta_{42}$ , tTau, pTau,  
581 tTau/ $A\beta_{42}$ , and pTau/ $A\beta_{42}$ ). All estimates are standardized and adjusted for gender, age, N-SES,  
582 ethnicity, educational attainment, and BMI. The dashed line indicates the significance threshold: 0  
583 for linear regression.  
584

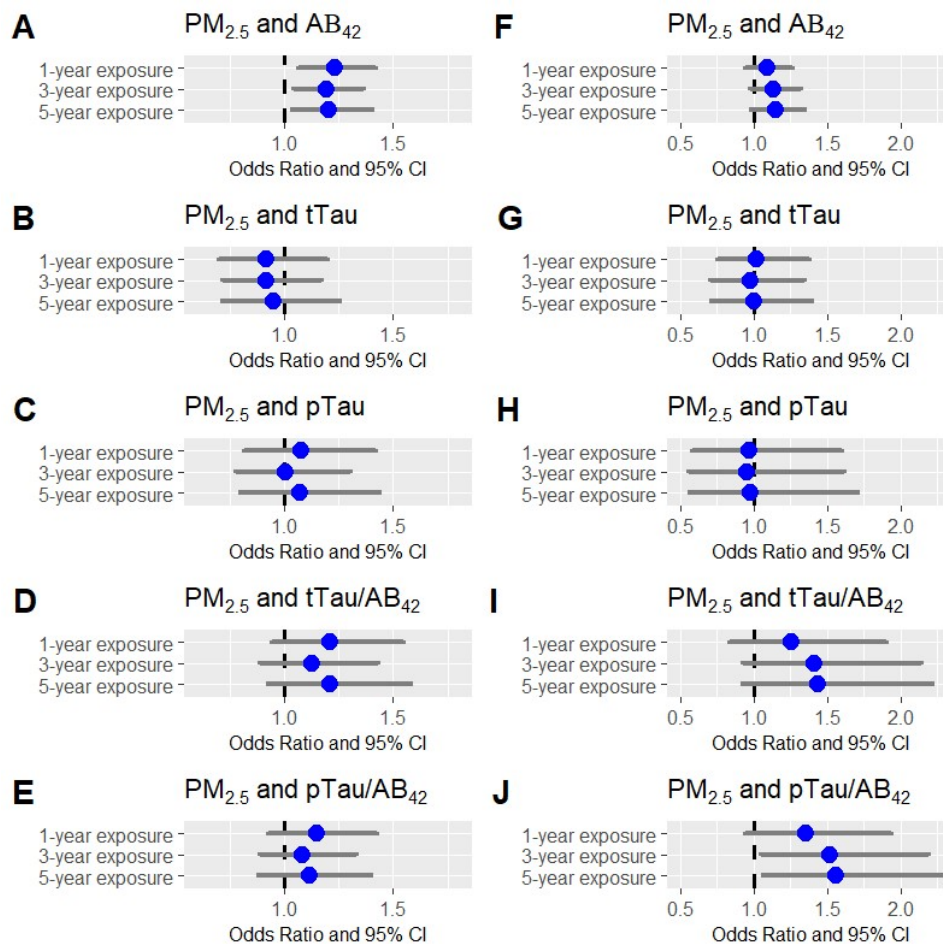

586  
 587 **Figure 3** Odds ratio ( $\pm$  95% CI) for the association between 1, 3, and 5-year ambient (A–E)  
 588 (N=1,113) and traffic-related (F–J) (N=1,080)  $PM_{2.5}$  exposure and AD CSF Biomarkers positive (+)  
 589 cut-offs ( $A\beta_{42}$ , tTau, pTau, tTau/ $A\beta_{42}$ , and pTau/ $A\beta_{42}$ ). All estimates are adjusted for gender, age, N-  
 590 SES, ethnicity, educational attainment, and BMI. The dashed line indicates the significance  
 591 threshold: 1 for logistic regression.  
 592

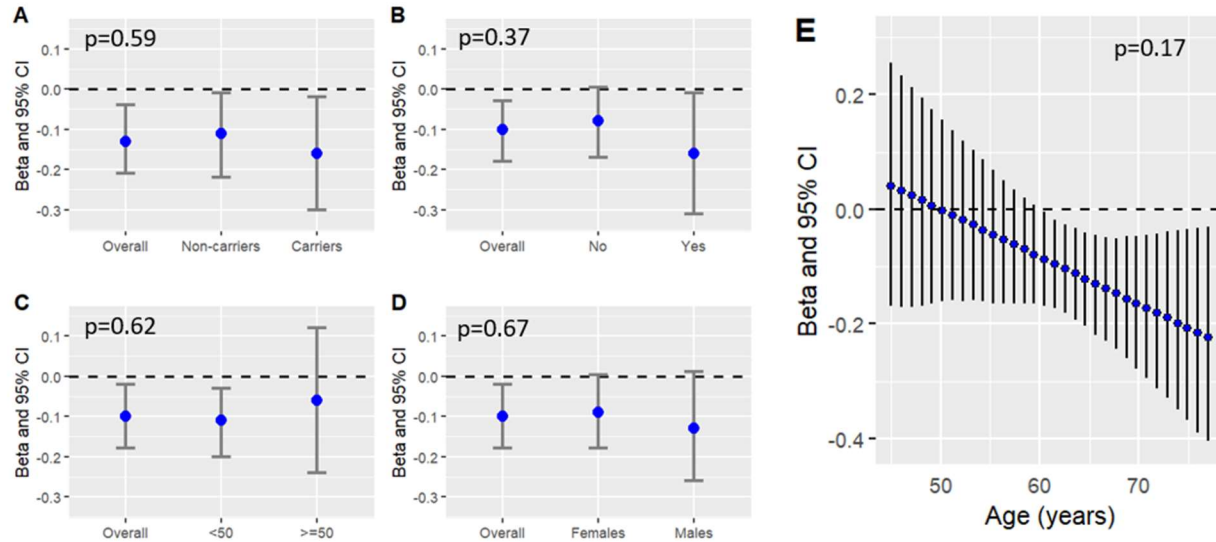

593  
594 **Figure 4** Effect ( $\pm$  95% CI) of yearly ambient PM<sub>2.5</sub> exposure on Aβ<sub>42</sub> CSF concentrations (in pg/mL)  
595 by APOE-ε4 carriership (**A**), AD family history (**B**), ADI (**C**), Gender (**D**), and Age (**E**). Presented as  
596 overall and stratified effects for dichotomous variables and as continuous for Age, with interaction p-  
597 values depicted on each graph. The dashed line indicates the significance threshold: 0 for linear  
598 regression. The overall effect in **Figure 4A** (N=855) differs slightly from **Figure 4B-D** (N=1113) due  
599 to the decreased sample size after including only participants with APOE genotype data.
